# Supplementary material for: Failure analysis of the Ge-substituted Li6PS5I with bare LiNi0.8Co0.1Mn0.1O2 and performance improvement via Li2ZrO3 coating
Source: Royal Society of Chemistry journal article supplement (doi:10.1039/d2ta03168j), 2022-01-01
Supplement: d2ta03168j1.pdf [file d2ta03168j1.pdf]

Failure analysis of the Ge-substituted  $\text{Li}_6\text{PS}_5\text{I}$  with bare  $\text{LiNi}_{0.8}\text{Co}_{0.1}\text{Mn}_{0.1}\text{O}_2$  and  
performance improvement via  $\text{Li}_2\text{ZrO}_3$  coating

Ziqi Zhang<sup>2, #</sup>, Jingming Yao<sup>2, #</sup>, Chuang Yu<sup>1, \*</sup>, Ruonan Xu<sup>2</sup>, Jun Ma<sup>2</sup>, Chaochao Wei<sup>1</sup>, Linfeng Peng<sup>1</sup>, Long  
Zhang<sup>2, \*</sup>, Shijie Cheng<sup>1</sup>, Jia Xie<sup>1, \*</sup>

<sup>1</sup> *State Key Laboratory of Advanced Electromagnetic Engineering and Technology, School of Electrical and  
Electronic Engineering, Huazhong University of Science and Technology, Wuhan 430074, P. R. China*

<sup>2</sup> *Clean Nano Energy Center, State Key Laboratory of Metastable Materials Science and Technology, Yanshan  
University, Qinhuangdao 066004, Hebei, China*

*# The authors make equal contribution.*

\* Address correspondence to E-mail: [cyu2020@hust.edu.cn](mailto:cyu2020@hust.edu.cn), [xiejia@hust.edu.cn](mailto:xiejia@hust.edu.cn), [lzhang@ysu.edu.cn](mailto:lzhang@ysu.edu.cn)

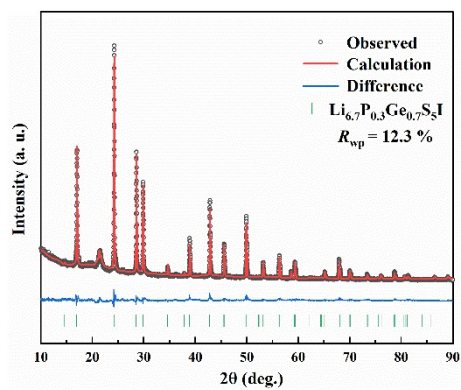

**Figure S1.** Rietveld refinement of  $\text{Li}_{6.7}\text{P}_{0.3}\text{Ge}_{0.7}\text{S}_5\text{I}$  electrolytes.

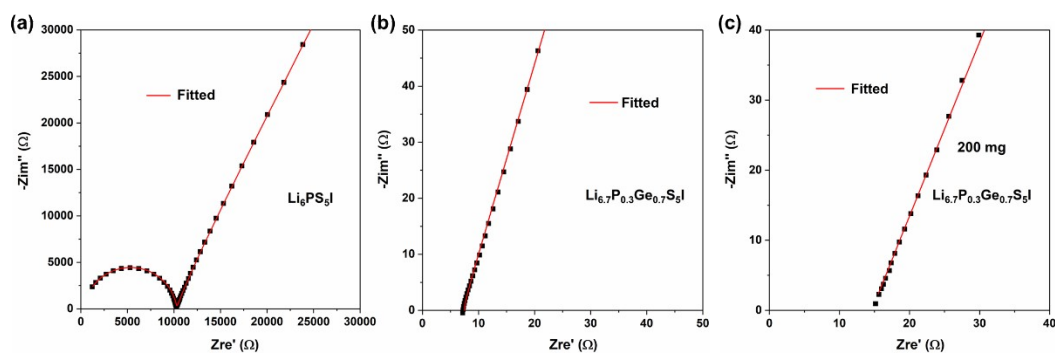

**Figure S2.** The EIS of (a)  $\text{Li}_6\text{PS}_5\text{I}$  with a mass loading 100 mg at room temperature. The EIS of  $\text{Li}_{6.7}\text{P}_{0.3}\text{Ge}_{0.7}\text{S}_5\text{I}$  electrolytes with mass loading of (b) 100 mg and (c) 200 mg at room temperature.

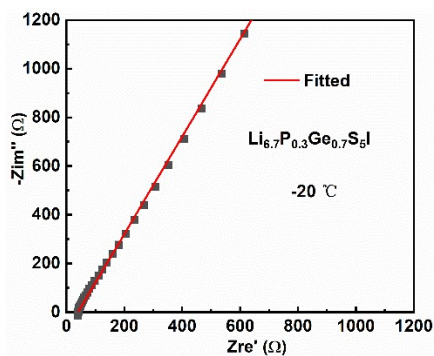

**Figure S3.** The EIS and fitted curve of  $\text{Li}_{6.7}\text{P}_{0.3}\text{Ge}_{0.7}\text{S}_5\text{I}$  electrolyte at  $-20\text{ }^\circ\text{C}$ .

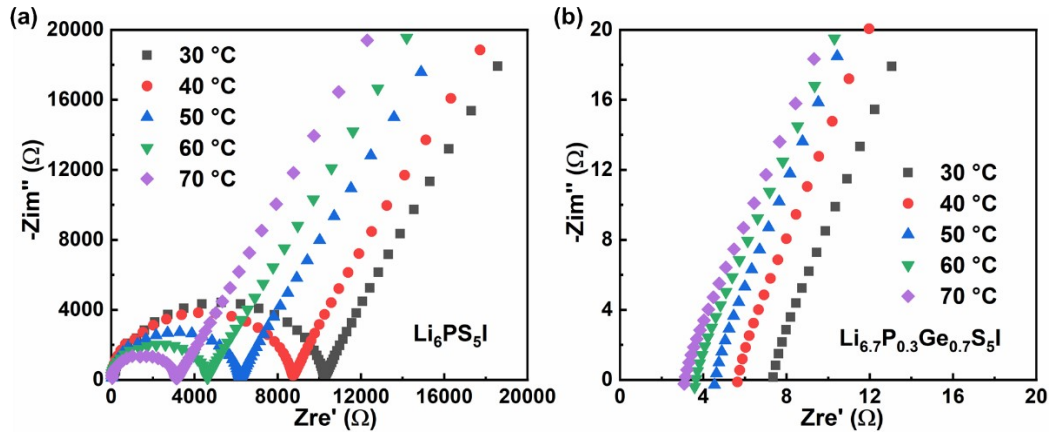

**Figure S4.** Complex EIS of (a)  $\text{Li}_6\text{PS}_5\text{I}$  and (b)  $\text{Li}_{6.7}\text{P}_{0.3}\text{Ge}_{0.7}\text{S}_5\text{I}$  electrolytes at different temperatures.

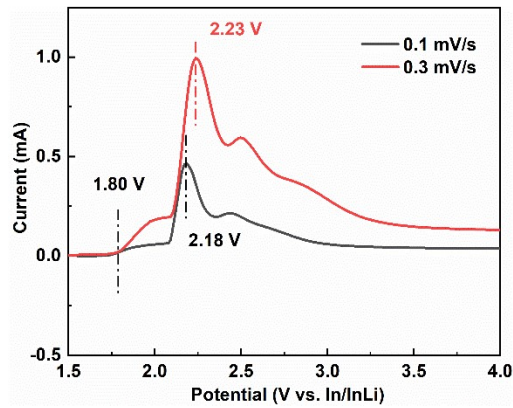

**Figure S5.** Comparison of  $\text{Li}_{6.7}\text{P}_{0.3}\text{Ge}_{0.7}\text{S}_5\text{I}@C/\text{Li}_{6.7}\text{P}_{0.3}\text{Ge}_{0.7}\text{S}_5\text{I}/\text{In}$  cells for CV tests with different scanning rates.

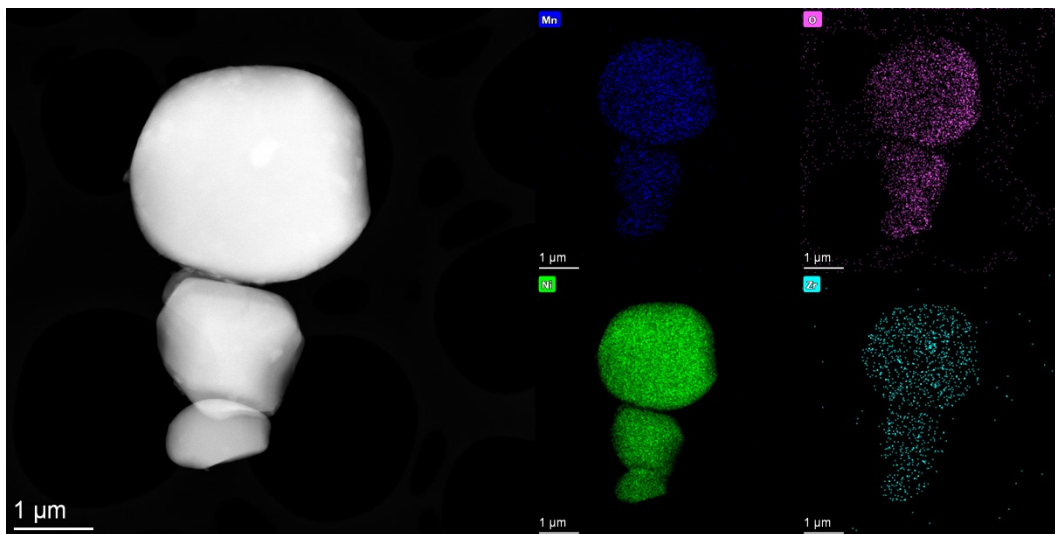

**Figure S6.** TEM and elemental mapping results for the LZO@NCM811 particles.

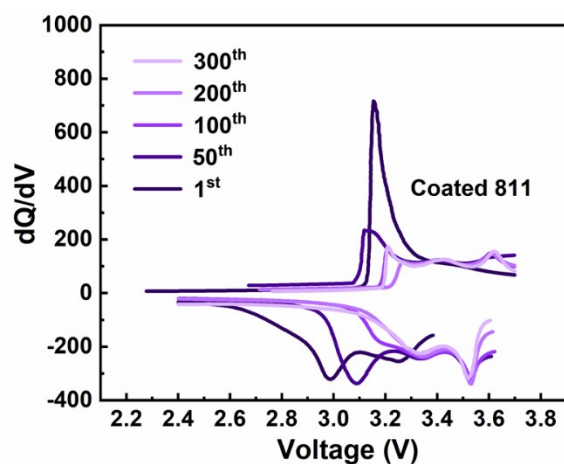

**Figure S7.** dQ/dV curves of the assembled LZO@NCM811/Li<sub>6.7</sub>P<sub>0.3</sub>Ge<sub>0.7</sub>S<sub>5</sub>I/In-Li battery at different cycles at room temperature.

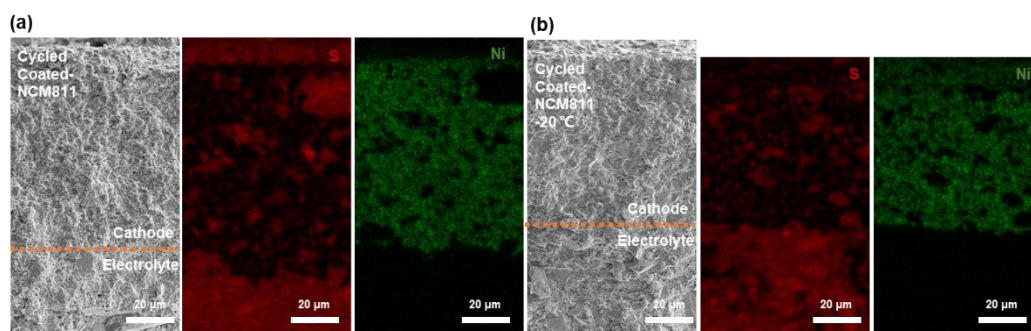

**Figure S8.** SEM images and the corresponding EDS mapping of the cross-section of the cycled LZO@NCM811/Li<sub>6.7</sub>P<sub>0.3</sub>Ge<sub>0.7</sub>S<sub>5</sub>I/In-Li batteries (a) at room temperature and (b) at -20 °C.

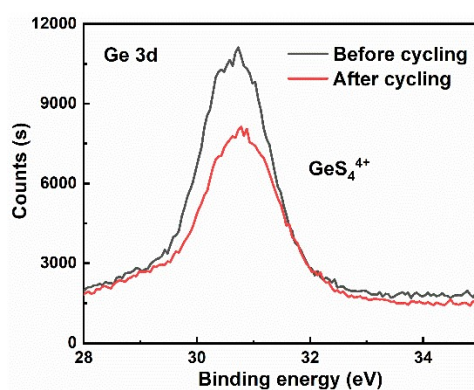

**Figure S9.** XPS results of the LZO@NCM811 cathode for Ge 3d (e) before and (f) after cycling at -20 °C

**Table S1.** Crystallographic information of fitted  $\text{Li}_{6.7}\text{P}_{0.3}\text{Ge}_{0.7}\text{S}_5\text{I}$  electrolytes.

$$\lambda_1(\text{Cu}) = 1.54056, \lambda_2(\text{Cu}) = 1.54439$$

$$a = 10.28625 \text{ \AA}, R_{\text{wp}} = 12.3 \%$$

| Atom | Wyckoff Site | x       | y       | z       | Occ     |
|------|--------------|---------|---------|---------|---------|
| Li0  |              | 0.02329 | 0.25    | 0.25    | 0.25    |
| P1   | 4b           | 0       | 0       | 0.5     | 0.0125  |
| Ge1  | 4b           | 0       | 0       | 0.5     | 0.0292  |
| S1   | 16e          | 0.11784 | 0.11784 | 0.61784 | 0.16667 |
| S2   | 4d           | 0.25    | 0.25    | 0.25    | 0.03957 |
| S3   | 4a           | 0       | 0       | 0       | 0.00208 |
| I1   | 4a           | 0       | 0       | 0       | 0.03957 |
| I2   | 4d           | 0.25    | 0.25    | 0.25    | 0.00208 |

**Table S2.** The relevant parameters of different samples for the ionic conductivity calculation.

| Samples                                                                          | Thickness (cm) | Area (cm <sup>2</sup> ) | Resistance ( $\Omega$ ) | Ionic conductivity (mS/cm) |
|----------------------------------------------------------------------------------|----------------|-------------------------|-------------------------|----------------------------|
| $\text{Li}_{6.7}\text{P}_{0.3}\text{Ge}_{0.7}\text{S}_5\text{I}$ (RT, 100mg)     | 0.0713         | 0.785                   | 6.94                    | 13.09                      |
| $\text{Li}_6\text{PS}_5\text{I}$ (RT, 100mg)                                     | 0.073          | 0.785                   | 9946                    | 0.0093                     |
| $\text{Li}_{6.7}\text{P}_{0.3}\text{Ge}_{0.7}\text{S}_5\text{I}$ (RT, 200mg)     | 0.1481         | 0.785                   | 14.56                   | 12.96                      |
| $\text{Li}_{6.7}\text{P}_{0.3}\text{Ge}_{0.7}\text{S}_5\text{I}$ (-20°C, 100 mg) | 0.0713         | 0.785                   | 41.24                   | 2.2                        |
